# Supplementary material for: Interactive Effect of Biological Agents Chitosan, Lentinan and Ningnanmycin on Papaya Ringspot Virus Resistance in Papaya (Carica papaya L.)
Source: MDPI journal article supplement (doi:10.3390/molecules27217474), 2022-11-02
Supplement: s1 [file s1]

# Interactive Effect of Biological Agents Chitosan, Lentinan and Ningnanmycin on Papaya Ringspot Virus Resistance in Papaya (*Carica papaya* L.)

Heling Fan <sup>1,2</sup>, Xingxiang Yan <sup>1</sup>, Mingqing Fu <sup>1</sup>, Difa Liu <sup>1,2</sup>, Abdul Waheed Awan <sup>1,4</sup>, Ping Chen <sup>3</sup>, Syed Majid Rasheed <sup>4</sup>, Ling Gao <sup>2,\*</sup> and Rongping Zhang <sup>1,\*</sup>

<sup>1</sup> College of Tropical Crops, Hainan University, Haikou, Hainan Province, China

<sup>2</sup> Tropical Crops Genetic Resources Institute (CATAS), Danzhou 571737, China

<sup>3</sup> College of Horticulture, Hainan University, Haikou, Hainan Province, China

<sup>4</sup> Department of Agriculture, Bacha Khan University, Charsadda, Pakistan

\* Correspondence: gaoling\_0898@163.com (L.G.); 990837@hainanu.edu.cn (R.Z.)

**Table S1.** Primers for quantitative real-time PCR.

| Gene ID                      | Sequence information            |
|------------------------------|---------------------------------|
| CpActin-QF                   | 5'-AGGCAGGCAAGAGAAGAT-3'        |
| CpActin-QR                   | 5'-TTCATACCGAGTAGCGATTC-3'      |
| evm.TU.supercontig_20.79-QF  | 5'-TCCCCCAAGATTTCCTGA-3'        |
| evm.TU.supercontig_20.79-QR  | 5'-GTTGGTTGGCGTAGTTCTGC-3'      |
| evm.TU.supercontig_44.71-QF  | 5'-CTAATCGCAGAAGCCAATCAT-3'     |
| evm.TU.supercontig_44.71QR   | 5'-CCTCACCCCTCTGTACGACC-3'      |
| evm.TU.supercontig_42.87-QF  | 5'-ACCCGTGTCGGCTTCTACTC-3'      |
| evm.TU.supercontig_42.87-QR  | 5'-CCATCACAACCACGAACAAAAC-3'    |
| evm.TU.supercontig_77.100-QF | 5'-GGTTCAAAGCTATTGCTCTTACAGT-3' |
| evm.TU.supercontig_77.100-QR | 5'-AACCCTCAAAGTTCTTCAATGTC-3'   |
| evm.TU.supercontig_2.212-QF  | 5'-GAGACCTTTGATGGATTTCGTG-3'    |
| evm.TU.supercontig_2.212-QR  | 5'-GTTTTCCCACTAAGTCCACAT-3'     |
| evm.TU.supercontig_118.34-QF | 5'-AGCATTGGACAGGCTCTTTTC-3'     |
| evm.TU.supercontig_118.34-QR | 5'-CGCTTGTTCCATCTGGTGTAAT-3'    |
| evm.TU.supercontig_19.185-QF | 5'-AGAACCTTGCGAAGAATGTAGC-3'    |
| evm.TU.supercontig_19.185-QR | 5'-CAACTCACACTCTCTGAACCTCTG-3'  |

**Table S2.** qPCR reaction system.

| 2 ×qPCR Master Mix     | 10 μL  |
|------------------------|--------|
| Forward primer (10 μM) | 0.3 μL |
| Reverse primer (10 μM) | 0.3 μL |
| cDNA template          | 1.0 μL |
| ddH <sub>2</sub> O     | 8.4 μL |

**Table S3.** Table of RNA detection results.

| Sample name | Concentration (ng $\mu\text{L}^{-1}$ ) | Volume ( $\mu\text{L}$ ) | Overall amount ( $\mu\text{g}$ ) | OD260/280 | OD260/230 | 28S/18S | RIN | Detection results |
|-------------|----------------------------------------|--------------------------|----------------------------------|-----------|-----------|---------|-----|-------------------|
| CK1         | 1346.84                                | 50                       | 67.34                            | 2.024     | 1.948     | 1.2     | 7.1 | A                 |
| CK2         | 1332.24                                | 50                       | 66.61                            | 2.036     | 1.709     | 1.4     | 8,0 | A                 |
| CK3         | 1270.48                                | 50                       | 63.52                            | 2.027     | 2.393     | 1.3     | 7.9 | A                 |
| T2_1        | 2155.20                                | 50                       | 107.76                           | 2.019     | 2.436     | 1.1     | 7.1 | A                 |
| T2_2        | 759.00                                 | 50                       | 37.95                            | 2.014     | 2.348     | 1.3     | 7.6 | A                 |
| T2_3        | 368.28                                 | 50                       | 18.41                            | 1.979     | 1.677     | 0.4     | 7.3 | A                 |

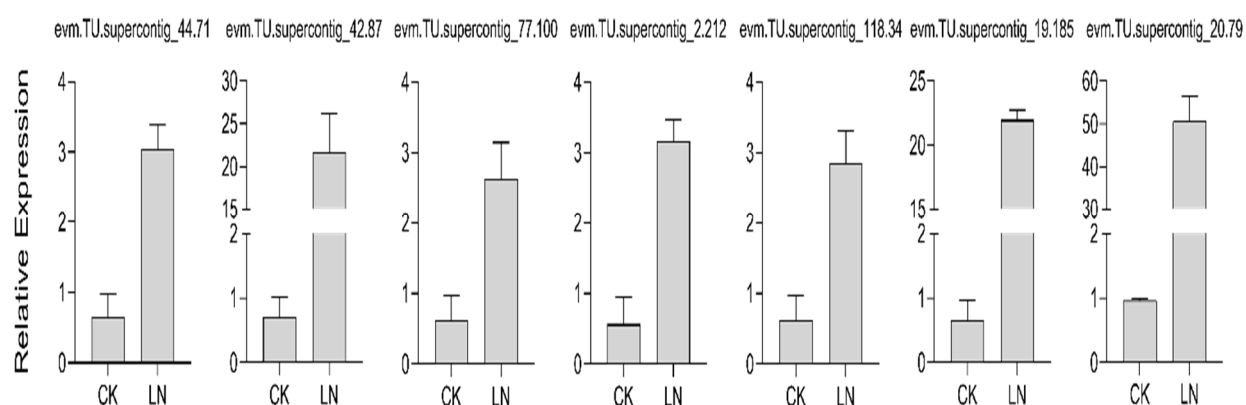

**Figure S4.** Verification assay of 7 differentially expressed genes (DEGs). The statistical significance of the differences was confirmed by analysis of variance (ANOVA).
